# Supplementary material
Source: publisher figshare collection journal article supplement (https://karger.figshare.com/ndownloader/files/15352574)
Supplement: Supplementary file 1 [file 15352574]

**Supplementary Table. Select 24-hour Urinary Parameters with Bardoxolone Methyl in the Pharmacodynamic Study**

| Mean Value (SD) | Baseline | Day 28 | Day 56 | Day 84 (off-treatment) |
| --- | --- | --- | --- | --- |
| Serum Calcium (mmol/L) |  |  |  |  |
| N | 24 | 21 | 20 | 19 |
| Mean value (SD) | 2.44 (0.13) | 2.38 (0.13) | 2.35 (0.16) | 2.38 (0.17) |
| Mean change from baseline (SD) | - | -0.03 (0.11) | -0.07 (0.13) | -0.04 (0.13) |
| Serum Potassium (mmol/L) |  |  |  |  |
| N | 24 | 21 | 19 | 19 |
| Mean value (SD) | 4.4 (0.5) | 4.5 (0.5) | 4.4 (0.5) | 4.5 (0.4) |
| Mean change from baseline (SD) |  | 0.0 (0.4) | -0.1 (0.5) | 0.0 0.4 |
| Serum Phosphate (mmol/L) |  |  |  |  |
| N | 24 | 21 | 20 | 19 |
| Mean value (SD) | 1.30 (0.22) | 1.26 (0.29) | 1.19 (0.22) | 1.26 (0.18) |
| Mean change from baseline (SD) |  | -0.02 0.22 | -0.10 0.15 | -0.02 0.21 |
